# Supplementary material for: Influence of Environmental Factors on the Sap Flow Activity of the Golden Pear in the Growth Period of Karst Area in Southern China
Source: MDPI journal article supplement (doi:10.3390/w14111707), 2022-05-26
Supplement: s1 [file s1]

Archive with 1 entries (1 files):
- water-1696764-supplementary.pdf
