# Supplementary material for: Influence of Environmental Factors on the Sap Flow Activity of the Golden Pear in the Growth Period of Karst Area in Southern China
Source: MDPI journal article supplement (doi:10.3390/w14111707), 2022-05-26
Supplement: s1 [file s1 › water-1696764-supplementary.pdf]

## Supplementary material

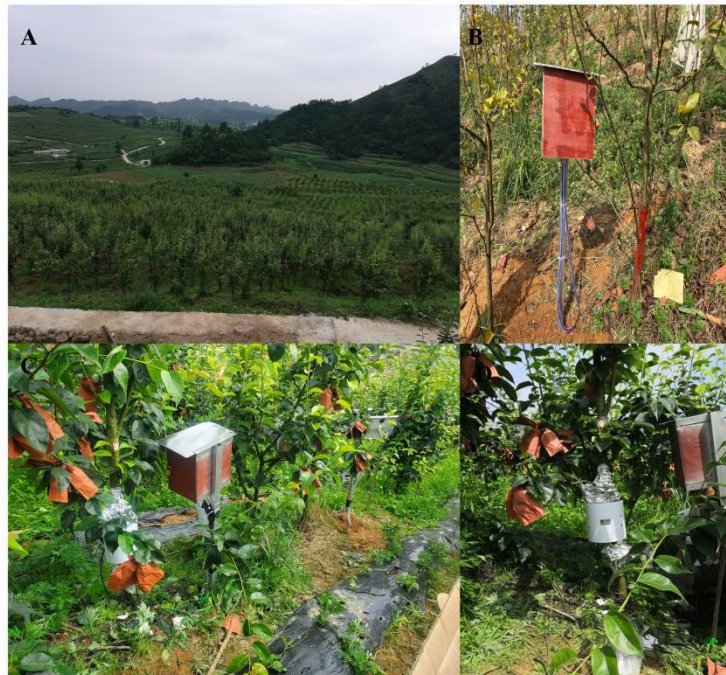

**Figure S1.** An overview of the study area and the layout of the instruments. (a) An overview of the study area, (b), (c) and (d) sap flow sensor and plant stem infiltration water potential meter.

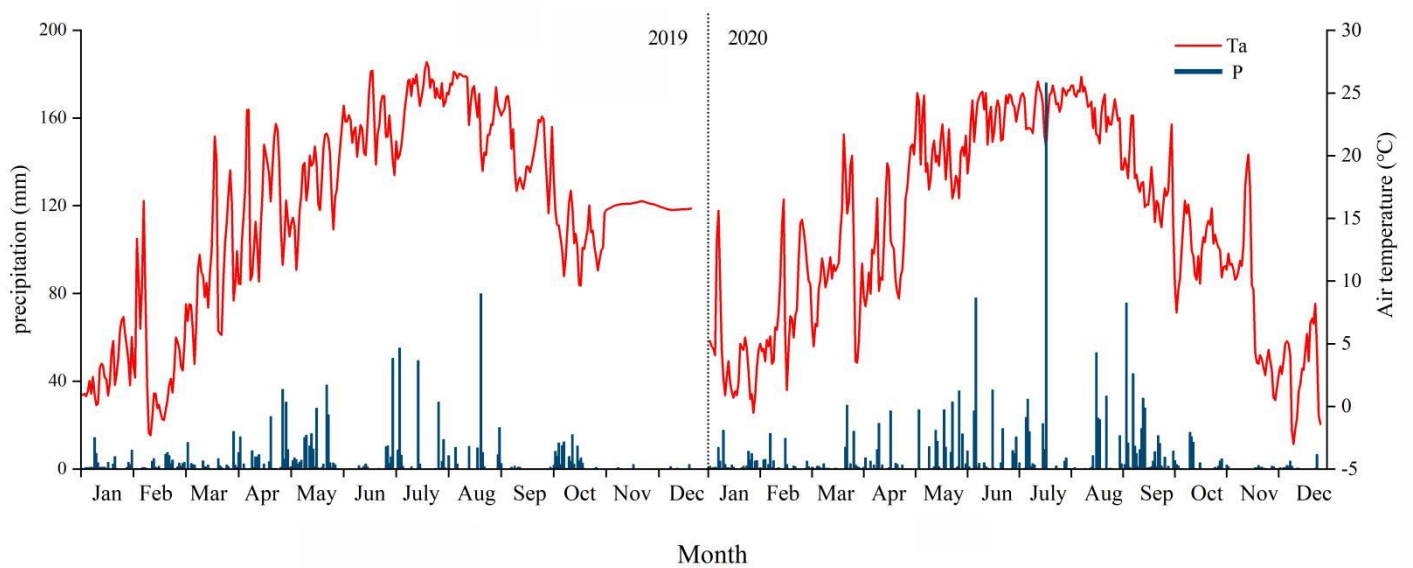

**Figure S2.** Data map of temperature and precipitation in the study area in 2019 and 2020.

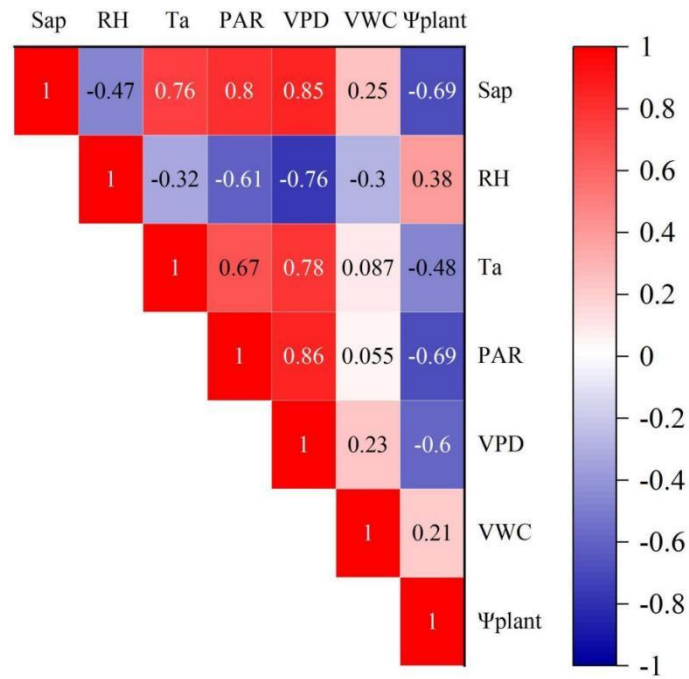

**Figure S3.** Correlations between environmental factors. Sap: sap flow; RH: relative humidity; Ta: air temperature; PAR: photosynthetically active radiation; VPD: vapor pressure deficit; VWC: volumetric water content;  $\Psi_{\text{plant}}$ : plant water potential. Significance level less than 0.05 (two-tailed test).
